# Supplementary material for: Synergistic Internal Ribosome Entry Site/MicroRNA-Based Approach for Flavivirus Attenuation and Live Vaccine Development
Source: PubMed Central journal article supplement (PMC5395672; doi:10.1128/mbio.02326-16), 2017-04-18
Supplement: mbo002173275sf2.pdf [file mbo002173275sf2.pdf]

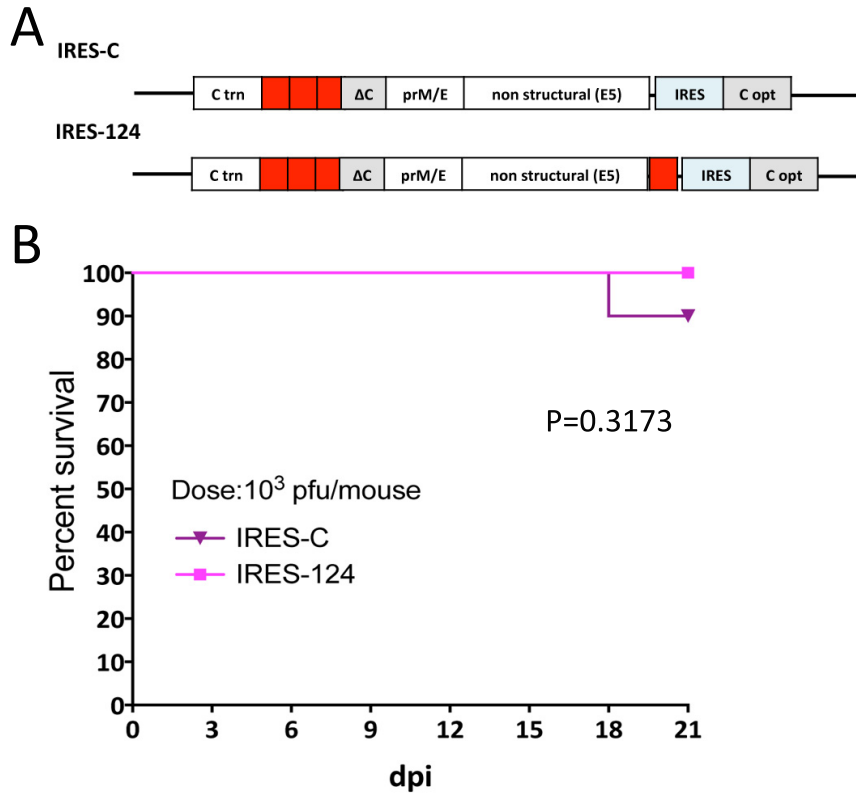

**Supplementary Figure S2. Insertion of an additional copy of mir-124(T) sequence between NS5 gene and 5' end of IRES in IRES-C reduces mortality of newborn SW mice after IC infection with bicistronic LGTV.**

(A) Schematic representation of the viral genomes used in the study. (B) Survival of newborn SW mice (n=10) inoculated IC with  $10^3$  pfu/mouse of rLGTVs. Differences in survival curves were compared using log-rank (Mantel-Cox) test.
