# Supplementary material for: Synergistic Internal Ribosome Entry Site/MicroRNA-Based Approach for Flavivirus Attenuation and Live Vaccine Development
Source: PubMed Central journal article supplement (PMC5395672; doi:10.1128/mbio.02326-16), 2017-04-18
Supplement: mbo002173275sf4.pdf [file mbo002173275sf4.pdf]

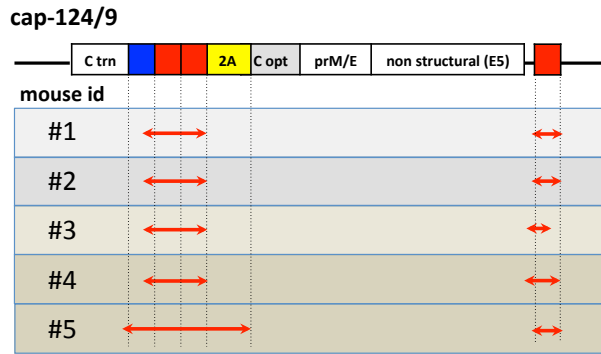

**Supplementary Figure S4. Sequence analysis of cap-124/9 viruses recovered from the brain of morbid SCID mice.**

SCID mice (n = 5) were infected IP with  $10^5$  pfu/mouse. Mice succumbed to encephalitis between dpi 26-31. Brains from paralyzed mice were collected and used for viral isolation and sequencing analysis. Red double arrows schematically indicate the location of deleted sequences in the cap-124/9 genome.
