# Supplementary material for: Synergistic Internal Ribosome Entry Site/MicroRNA-Based Approach for Flavivirus Attenuation and Live Vaccine Development
Source: PubMed Central journal article supplement (PMC5395672; doi:10.1128/mbio.02326-16), 2017-04-18
Supplement: mbo002173275sf5.pdf [file mbo002173275sf5.pdf]

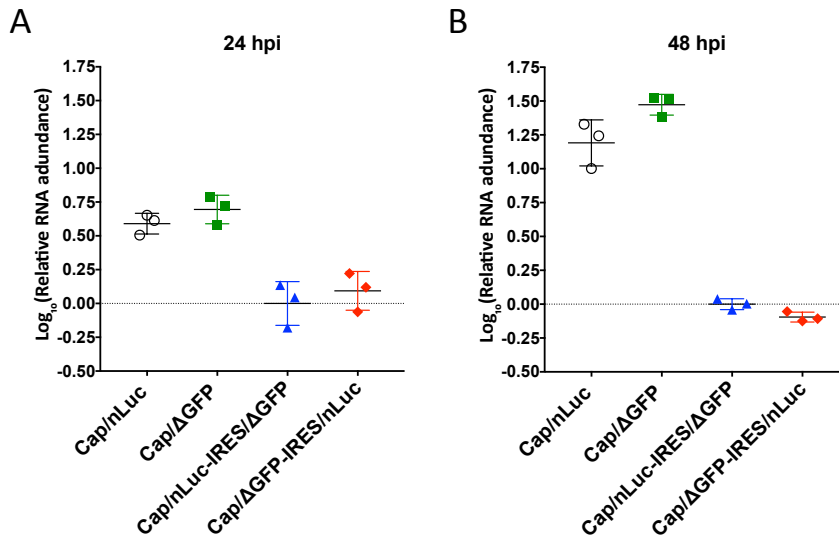

**Supplementary Figure S5. Relative abundance of the LGTV replicons' RNA in Vero cells at 24 (A) and 48 (B) hrs post transfection.**

Vero cells were transfected with equal amount of LGTV replicons' RNA. At 24 and 48 hpi total RNA was extracted from 3 independent wells of Vero cells (presented as individual points on the graph). Relative RNA abundance of each replicons' RNA was calculated as a 2 in the power of  $\alpha$ , where  $\alpha$  was calculated as the difference between Ct values of each sample and the average Ct value of Cap/nLuc-IRES/ΔGFP replicon (shown as the dashed line). Results are presented as mean  $\pm$  SD (shown as error bars).
